# Supplementary material
Source: HighWire-hosted journal article supplement (https://www.highwirestage.com/highwire/filestream/98099/field_highwire_adjunct_files/0/0038.pdf)
Supplement: 0038.pdf [file 0038.pdf]

**Online Supplemental Table: Demographic and clinical information**

| <i>Demographic</i>                       |                        |
|------------------------------------------|------------------------|
| Sex                                      | Male = 31, Female = 20 |
| Median age (years [range])               | 61 (21– 89)            |
| <i>Clinical</i>                          |                        |
| Subsites of the primary cancer           |                        |
| Major salivary gland                     | 14/51 (27.5%)          |
| Sinonasal cavity                         | 11/51 (21.6%)          |
| Oral cavity                              | 10/51 (19.6%)          |
| Nasopharynx                              | 8/51 (15.7%)           |
| Oropharynx                               | 6/51 (11.8%)           |
| Cheek                                    | 1/51 (2%)              |
| Sinonasal cavity and nasopharynx         | 1/51 (2%)              |
| Histology of the primary cancer          |                        |
| Squamous cell carcinoma                  | 26/51 (51%)            |
| Adenoid cystic carcinoma                 | 13/51 (25.5%)          |
| Mucoepidermoid carcinoma                 | 7/51 (13.7%)           |
| Undifferentiated carcinoma               | 2/51 (4%)              |
| Acinic cell carcinoma                    | 1/51 (2%)              |
| Basal cell adenocarcinoma                | 1/51 (2%)              |
| Secretory analogue carcinoma             | 1/51 (2%)              |
| TNM classification of the primary cancer |                        |
| T1                                       | 9/51 (17.6%)           |
| T2                                       | 7/51 (13.7%)           |
| T3                                       | 6/51 (11.8%)           |
| T4                                       | 27/51 (52.9%)          |
| N0                                       | 39/51 (76.5%)          |
| N1                                       | 4/51 (7.8%)            |
| N2                                       | 6/51 (11.8%)           |
| M0                                       | 48/51 (94.1%)          |
| M1                                       | 1/51 (2%)              |
| Unknown                                  | 2/51 (4%)              |
| Treatment method                         |                        |
| Surgery and radiotherapy                 | 15/51 (29.4%)          |

|                                                           |               |
|-----------------------------------------------------------|---------------|
| Chemoradiotherapy                                         | 14/51 (27.5%) |
| Surgery alone                                             | 14/51 (27.5%) |
| Radiotherapy alone                                        | 4/51 (7.8%)   |
| Surgery and chemoradiotherapy                             | 3/51 (5.9%)   |
| Surgery and chemotherapy                                  | 1/51 (2%)     |
| Reference method of recurrence (N = 26)                   |               |
| Pathology                                                 | 20/26 (76.9%) |
| Imaging follow-up                                         | 6/26 (23.1%)  |
| Reference method of benign post-treatment change (N = 25) |               |
| Pathology                                                 | 4/25 (16%)    |
| Imaging follow-up                                         | 21/25 (84%)   |

---

**Online Supplemental Figure 1: Flow diagram summarizing the patient selection.**

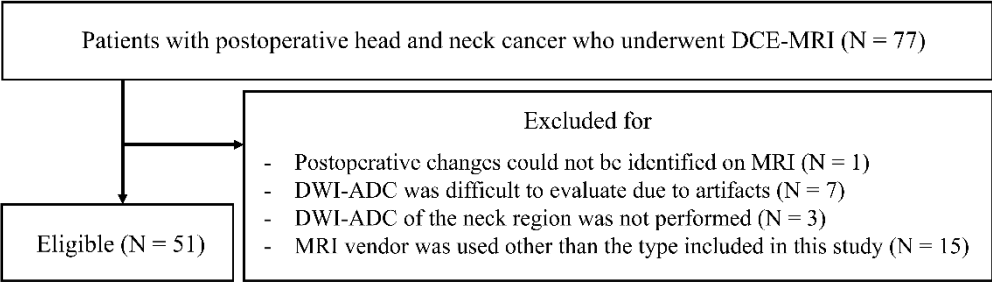

**Online Supplemental Figure 2: A case of head and neck cancer recurrence.**

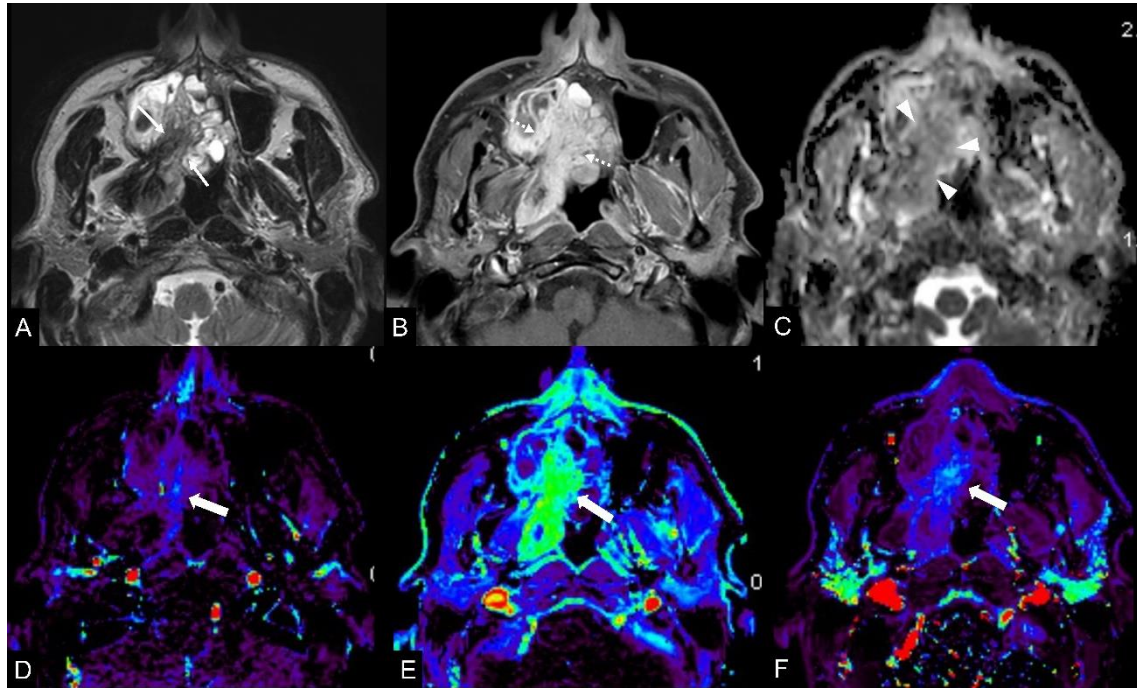

A 51-year-old man. After surgery and radiation therapy for adenoid cystic carcinoma of the right maxillary sinus. The right maxillary sinus surgical bed mass shows low signal intensity (arrows) on T2WI (A) and mild enhancement (dotted arrows) on post-contrast fat-suppressed T1WI (B). ADC map (C) shows low signal (arrowheads), with an  $nADC_{mean}$  of 1.47. DCE-MRI (D, Vp; E, Ve; F, Ktrans) shows increased parameters (thick arrows), with an  $nVp$  of 7.66,  $nVe$  of 2.43, and  $nKtrans$  of 3.02.

$nADC_{mean}$ , normalized mean apparent diffusion coefficient; DCE, dynamic contrast-enhanced; Vp, plasma volume; Ve, extracellular extravascular volume fraction; Ktrans, volume transfer constant between EES and blood plasma per minute,  $nVp$ , normalized Vp;  $nVe$ , normalized Ve,  $nKtrans$ , normalized Ktrans

**Online Supplemental Figure 3: A case of benign post-treatment change of head and neck cancer.**

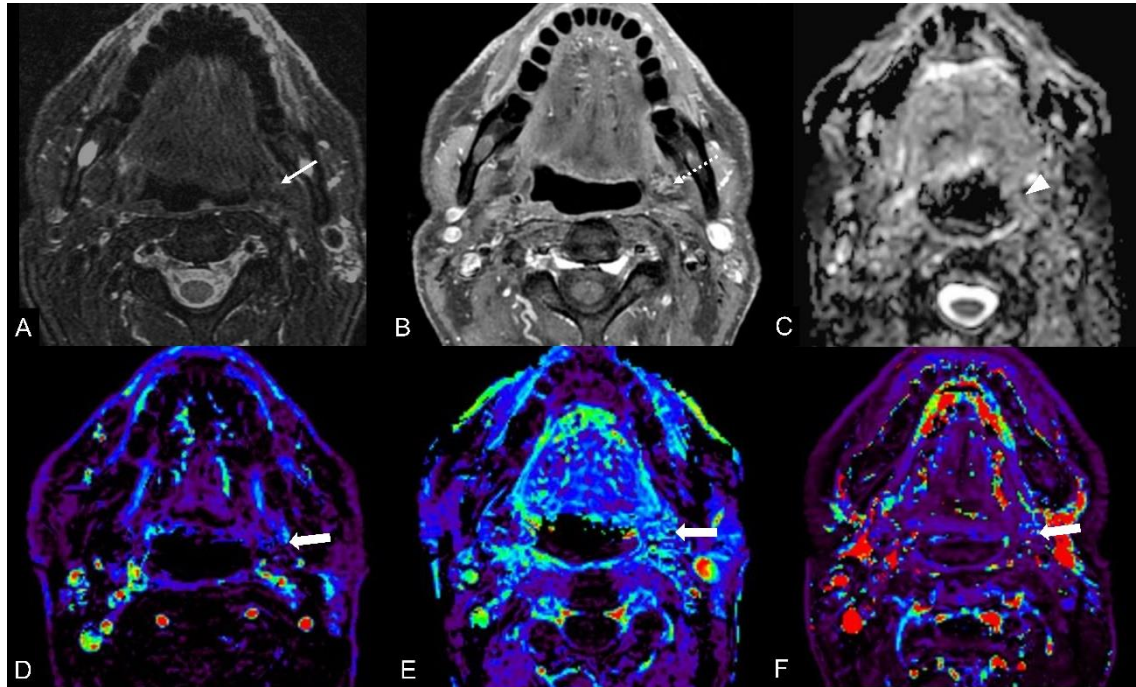

A 62-year-old man. After surgery and chemoradiation therapy for squamous cell carcinoma of the left palatine tonsil. The left lateral wall of oropharynx shows some low signal intensity (arrows) on fat-suppressed T2WI (A) and slight enhancement (dotted arrows) on post-contrast fat-suppressed T1WI (B). ADC map (C) shows some high signal (arrowheads), with an  $nADC_{mean}$  of 2.09. DCE-MRI (D,  $V_p$ ; E,  $V_e$ ; F,  $K_{trans}$ ) shows no increased parameters (thick arrows), with an  $nV_p$  of 0.67,  $nV_e$  of 1.14, and  $nK_{trans}$  of 1.97.

$nADC_{mean}$ , normalized mean apparent diffusion coefficient; DCE, dynamic contrast-enhanced;  $V_p$ , plasma volume;  $V_e$ , extracellular extravascular volume fraction;  $K_{trans}$ , volume transfer constant between EES and blood plasma per minute),  $nV_p$ , normalized  $V_p$ ;  $nV_e$ , normalized  $V_e$ ,  $nK_{trans}$ , normalized  $K_{trans}$
